1 **Enhanced transmissibility, infectivity and immune resistance of the**  
2 **SARS-CoV-2 Omicron XBB.1.5 variant**

3

4 Keiya Uriu<sup>1,2#</sup>, Jumpei Ito<sup>1#</sup>, Jiri Zahradnik<sup>3,4#</sup>, Shigeru Fujita<sup>1,2</sup>, Yusuke Kosugi<sup>1,2</sup>,  
5 Gideon Schreiber<sup>3</sup>, The Genotype to Phenotype Japan (G2P-Japan) Consortium,  
6 Kei Sato<sup>1,2,5,6,7,8,9\*</sup>

7

8 <sup>1</sup> Division of Systems Virology, Department of Microbiology and Immunology,  
9 The Institute of Medical Science, The University of Tokyo, Tokyo, Japan

10 <sup>2</sup> Graduate School of Medicine, The University of Tokyo, Tokyo, Japan

11 <sup>3</sup> Department of Biomolecular Sciences, Weizmann Institute of Science, Rehovot,  
12 Israel

13 <sup>4</sup> First Medical Faculty at Biocev, Charles University, Vestec-Prague, Czechia

14 <sup>5</sup> International Research Center for Infectious Diseases, The Institute of Medical  
15 Science, The University of Tokyo, Tokyo, Japan

16 <sup>6</sup> International Vaccine Design Center, The Institute of Medical Science, The  
17 University of Tokyo, Tokyo, Japan

18 <sup>7</sup> Graduate School of Frontier Sciences, The University of Tokyo, Kashiwa,  
19 Japan

20 <sup>8</sup> Collaboration Unit for Infection, Joint Research Center for Human Retrovirus  
21 infection, Kumamoto University, Kumamoto, Japan

22 <sup>9</sup> CREST, Japan Science and Technology Agency, Kawaguchi, Japan

23 # Contributed equally to this study.

24 \*Correspondence: KeiSato@g.ecc.u-tokyo.ac.jp (Kei Sato)

25

26 Conflict of interest: The authors declare that no competing interests exist.

27 Word count: 429/500 words, 8/8 references

28 **Abstract**

29 In 2022, we have elucidated the characteristics of a variety of newly emerging  
30 SARS-CoV-2 Omicron subvariants. At the end of 2022, the XBB.1.5 variant, an  
31 descendant of XBB.1 that acquired the S:F486P substitution, emerged and is  
32 rapidly spreading in the USA and is the latest variant of concern. Although the  
33 features of XBB.1.5 was already reported by another group as a preprint, we  
34 think multiple and independent evaluations important, and these reports are  
35 crucial for sustained global health. In this study, our epidemic dynamics analysis  
36 revealed that the relative effective reproduction number ( $R_e$ ) of XBB.1.5 is more  
37 than 1.2-fold greater than that of the parental XBB.1, and XBB.1.5 is  
38 outcompeting BQ.1.1, the predominant lineage in the USA as of December 2022.  
39 Our data suggest that XBB.1.5 will rapidly spread worldwide in the near future.  
40 Yeast surface display assay and pseudovirus assay respectively showed that the  
41 ACE2 binding affinity and infectivity of XBB.1.5 is 4.3-fold and 3.3-fold higher  
42 than those of XBB.1, respectively. Moreover, neutralization assay revealed that  
43 XBB.1.5 is robustly resistant to BA.2 breakthrough infection sera (41-fold versus  
44 B.1.1, 20-fold versus BA.2) and BA.5 breakthrough infection sera (32-fold versus  
45 B.1.1, 9.5-fold versus BA.5), respectively. Because the immune resistance of  
46 XBB.1.5 is comparable to that of XBB.1, our results suggest that XBB.1.5 is the  
47 most successful XBB lineage as of January 2023 by acquiring the S:F486P  
48 substitution to augment ACE2 binding affinity without losing remarkable immune  
49 resistance, which leads to greater transmissibility.

50 **Main**

51 In late 2022, the SARS-CoV-2 Omicron BQ.1 and XBB lineages, characterized  
52 by amino acid substitutions in the spike (S) proteins to increase viral fitness,  
53 have become predominant in the Western and Eastern Hemisphere,  
54 respectively.<sup>1,2</sup> The BQ.1 lineages are descendants of BA.5, while the XBB  
55 lineage is the recombinant of two highly diversified BA.2 lineages.<sup>2</sup>

56 In 2022, we have elucidated the characteristics of a variety of newly  
57 emerging SARS-CoV-2 Omicron subvariants.<sup>1-6</sup> At the end of 2022, the XBB.1.5  
58 variant, an descendant of XBB.1 that acquired the S:F486P substitution,  
59 emerged and is rapidly spreading in the USA (**Figure 1A**), and is the latest  
60 variant of concern.<sup>7</sup> Although the features of XBB.1.5 were reported by Yue et  
61 al.,<sup>8</sup> a comprehensive understanding of the virological characteristics of newly  
62 emerging variants is needed for sustained global health. Our epidemic dynamics  
63 analysis (see **Appendix**) revealed that the relative effective reproduction  
64 number ( $R_e$ ) of XBB.1.5 is more than 1.2-fold greater than that of the parental  
65 XBB.1, and XBB.1.5 is outcompeting BQ.1.1, the predominant lineage in the  
66 USA as of December 2022 (**Figures 1A and 1B and Table S1**). Our data  
67 suggest that XBB.1.5 will rapidly spread worldwide in the near future (**Figure 1B**).  
68 We also found that a part of XBB.1.5 lost the deletion of Y at residue 144 in S  
69 (S:Y144del), which increases immune escape ability but decreases viral  
70 infectivity.<sup>2</sup> However, the XBB.1.5 without S:Y144del (XBB.1.5+ins144Y) showed  
71 relatively lower  $R_e$  than the original XBB.1.5 (**Figure 1B**).

72 We next investigated the virological features of XBB.1.5. Yeast surface  
73 display assay showed that the  $K_D$  value of XBB.1.5 S receptor-binding domain  
74 (RBD) to human ACE2 receptor is significantly (4.3-fold) lower than that of  
75 XBB.1 S RBD (**Figure 1C**). Experiments using pseudoviruses also showed  
76 approximately 3-fold increased infectivity of XBB.1.5 compared to XBB.1 (**Figure**  
77 **1D**). These results suggest that XBB.1.5 exhibits remarkably strong affinity to  
78 human ACE2, which is attributed to the F486P substitution. On the other hand,  
79 the 144Y insertion mutation increased the XBB.1 infectivity but did not that of  
80 XBB.1.5 infectivity (**Figure 1D**).

81 Finally, neutralization assay revealed that XBB.1.5 is robustly (41-fold  
82 versus B.1.1, 20-fold versus BA.2) resistant to BA.2 breakthrough infection sera  
83 (**Figure 1E**). XBB.1.5 is also severely (32-fold versus B.1.1, 9.5-fold versus  
84 BA.5) resistant to BA.5 breakthrough infection sera (**Figure 1E**). The 144Y  
85 insertion significantly increased the sensitivity to both BA.2 and BA.5

86 breakthrough infection sera (**Figure 1E**).

87           In sum, our results suggest that XBB.1.5 is the most successful XBB  
88 lineage as of January 2023 by acquiring the S:F486P substitution to augment  
89 ACE2 binding affinity without losing remarkable immune resistance, which leads  
90 to greater transmissibility.

91 **Grants**

92 Supported in part by AMED SCARDA Japan Initiative for World-leading Vaccine  
93 Research and Development Centers "UTOPIA" (JP223fa627001, to Kei Sato),  
94 AMED SCARDA Program on R&D of new generation vaccine including new  
95 modality application (JP223fa727002, to Kei Sato); AMED Research Program on  
96 Emerging and Re-emerging Infectious Diseases (JP22fk0108146, to Kei Sato;  
97 JP21fk0108494 to G2P-Japan Consortium and Kei Sato; JP21fk0108425, to Kei  
98 Sato; JP21fk0108432, to Kei Sato); AMED Research Program on HIV/AIDS  
99 (JP22fk0410039, to Kei Sato); JST PRESTO (JPMJPR22R1, to Jumpei Ito); JST  
100 CREST (JPMJCR20H4, to Kei Sato); JSPS KAKENHI Grant-in-Aid for  
101 Early-Career Scientists (20K15767, Jumpei Ito); JSPS Core-to-Core Program (A.  
102 Advanced Research Networks) (JPJSCCA20190008, Kei Sato); JSPS Research  
103 Fellow DC2 (22J11578, to Keiya Uriu); The Tokyo Biochemical Research  
104 Foundation (to Kei Sato); and the project of National Institute of Virology and  
105 Bacteriology, Programme EXCELES, funded by the European Union, Next  
106 Generation EU (LX22NPO5103, to Jiri Zahradnik).

107

108 **Declaration of interest**

109 We declare no competing interests.

110 **References**

- 111 1. Ito J, Suzuki R, Uriu K, et al. Convergent evolution of the SARS-CoV-2  
112 Omicron subvariants leading to the emergence of BQ.1.1 variant. *BioRxiv* 2022:  
113 doi: <https://doi.org/10.1101/2022.12.05.519085>.
- 114 2. Tamura T, Ito J, Uriu K, et al. Virological characteristics of the  
115 SARS-CoV-2 XBB variant derived from recombination of two Omicron  
116 subvariants. *BioRxiv* 2022: doi: <https://doi.org/10.1101/2022.12.27.521986>.
- 117 3. Yamasoba D, Kimura I, Nasser H, et al. Virological characteristics of the  
118 SARS-CoV-2 Omicron BA.2 spike. *Cell* 2022.
- 119 4. Yamasoba D, Kosugi Y, Kimura I, et al. Neutralisation sensitivity of  
120 SARS-CoV-2 omicron subvariants to therapeutic monoclonal antibodies. *Lancet*  
121 *Infect Dis* 2022; **22**(7): 942-3.
- 122 5. Kimura I, Yamasoba D, Tamura T, et al. Virological characteristics of the  
123 novel SARS-CoV-2 Omicron variants including BA.4 and BA.5. *Cell* 2022;  
124 **185**(21): 3992-4007 e16.
- 125 6. Saito A, Tamura T, Zahradnik J, et al. Virological characteristics of the  
126 SARS-CoV-2 Omicron BA.2.75 variant. *Cell Host Microbe* 2022.
- 127 7. WHO. "XBB.1.5 Rapid risk assessment (January 11, 2023)"  
128 [https://www.who.int/docs/default-source/coronaviruse/11jan2023\\_xbb15\\_rapid\\_risk\\_assessment.pdf?sfvrsn=73e431e8\\_3](https://www.who.int/docs/default-source/coronaviruse/11jan2023_xbb15_rapid_risk_assessment.pdf?sfvrsn=73e431e8_3). 2022.
- 129  
130 8. Yue C, Song W, Wang L, et al. Enhanced transmissibility of XBB.1.5 is  
131 contributed by both strong ACE2 binding and antibody evasion. *BioRxiv* 2022:  
132 doi: <https://doi.org/10.1101/2023.01.03.522427>.

133

134

135 **Figure legend**

136 **Figure 1. Virological features of Omicron XBB.1.5.**

137 **(A)** Estimated epidemic dynamics of representative viral lineages in the USA  
138 [posterior mean, line; 95% Bayesian confidence interval (CI), ribbon].

139 **(B)** Estimated relative  $R_e$  for each viral lineage. The  $R_e$  value of XBB.1 is set at 1.  
140 The posterior (violin), posterior mean (dot), and 95% CI (line) are shown. The  
141 raw data are summarized in **Table S1**.

142 **(C)** Binding affinity of the RBD of SARS-CoV-2 S protein to ACE2 by yeast  
143 surface display. The  $K_D$  value indicating the binding affinity of the RBD of the  
144 SARS-CoV-2 S protein to soluble ACE2 when expressed on yeast is shown.

145 **(D)** Pseudovirus assay. HOS-ACE2-TMPRSS2 cells were infected with  
146 pseudoviruses bearing each S protein. The amount of input virus was  
147 normalized based on the amount of HIV-1 p24 capsid protein. The percent  
148 infectivity compared to that of the virus pseudotyped with the XBB.1 S protein  
149 are shown.

150 **(E)** Neutralization assay. Assays were performed with pseudoviruses harboring  
151 the S proteins of B.1.1, BA.2, BA.5, BQ.1.1, XBB.1, XBB.1+ins144Y, XBB.1.5,  
152 XBB.1.5+ins144Y. Convalescent sera from fully vaccinated individuals who had  
153 been infected with BA.2 after full vaccination (9 2-dose vaccinated and 4 3-dose  
154 vaccinated. 13 donors in total) (left) and those who had been infected with BA.5  
155 after full vaccination (2 2-dose vaccinated donors, 17 3-dose vaccinated donors  
156 and 1 4-dose vaccinated donors. 20 donors in total) (right) were used. The  
157 horizontal dashed line indicates the detection limit (120-fold).

158 In **C** and **D**, assays were performed in triplicate (**C**) or quadruplicate (**D**). The  
159 presented data are expressed as the average  $\pm$  SD. Statistically significant  
160 differences (\*,  $P < 0.05$ ) versus XBB.1 were determined by two-sided Student's  $t$   
161 tests. Red and blue asterisks, respectively, indicate increased and decreased  
162 values. The horizontal dashed line indicates the value of XBB.1. In **E**, each dot  
163 indicates the result of an individual replicate. Assays for each serum sample  
164 were performed in triplicate to determine the 50% neutralization titer ( $NT_{50}$ ).  
165 Each dot represents one  $NT_{50}$  value, and the geometric mean and 95% CI are  
166 shown. Statistically significant differences (\*,  $P < 0.05$ ) versus XBB.1 were  
167 determined by two-sided Wilcoxon signed-rank tests and indicated with asterisks.  
168 Red and blue asterisks, respectively, indicate decreased and increased  $NT_{50}$   
169 values. Information on the convalescent donors is summarized in **Table S2**.

**A**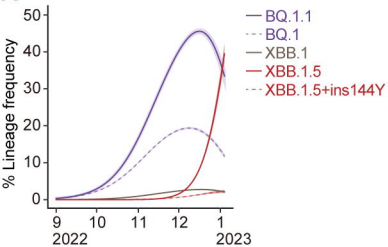**B**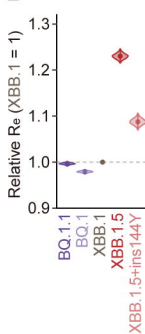**C**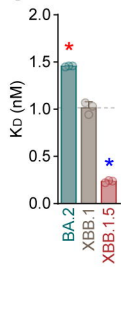**D**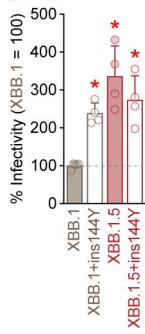**E**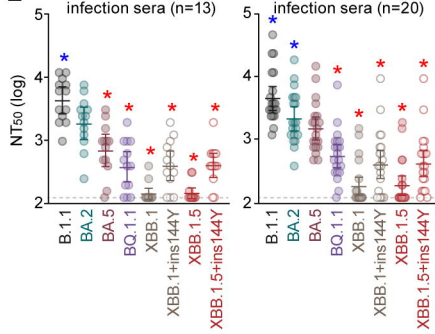

Source: https://www.biorxiv.org/content/10.1101/2023.01.16.524178v1.full.pdf
